# Supplementary material
Source: publisher figshare collection journal article supplement (https://acs.figshare.com/ndownloader/files/4674169)
Supplement: Supplementary file 1 [file 4674169]

data_General
_audit_creation_date                  '2007-04-23'
_audit_creation_method                'by CrystalStructure 3.8'
_audit_update_record                   ?

#==============================================================================

# PROCESSING SUMMARY (IUCr Office Use Only)

_journal_date_recd_electronic     ?
_journal_date_from_coeditor       ?
_journal_date_accepted            ?
_journal_coeditor_code            ?

#==============================================================================

# SUBMISSION DETAILS

_publ_contact_author_name             'Masayoshi Onishi'
_publ_contact_author_address
;
    Department of Applied Chemistry
    Faculty of Engineering
    Nagasaki University
    Nagasaki 852-8521
    Japan
;
_publ_contact_author_email            'onishi@nagasaki-u.ac.jp'
_publ_contact_author_fax              '+81-95-819-2684'
_publ_contact_author_phone            '+81-95-819-2671'
_publ_contact_letter
;
    ENTER TEXT OF LETTER
;
_publ_requested_journal               'Journal of the American Chemical Society'
_publ_requested_category              'CHOOSE FI FM FO CI CM CO or AD'
_publ_requested_coeditor_name          ?

#==============================================================================

# TITLE AND AUTHOR LIST

_publ_section_title
;
Reversible N-N Coupling of NO ligands on Dinuclear Ruthenium Complexes and 
Subsequent N2O Evolution: Relevance to Nitric Oxide Reductase
;
_publ_section_title_footnote
;
    ENTER FOOTNOTE TO TITLE OF PAPER
;
loop_
_publ_author_name
_publ_author_footnote
_publ_author_address
'Yasuhiro Arikawa'
;
  FIRST AUTHORS FOOTNOTES
;
;
    Department of Applied Chemistry
    Faculty of Engineering
    Nagasaki University
    Nagasaki 852-8521
    Japan
;
_publ_section_synopsis
;
  ENTER SYNOPSIS
;

#==============================================================================

# TEXT

_publ_section_abstract
;
    ENTER ABSTRACT
;
_publ_section_comment
;
    ENTER TEXT
;
_publ_section_references
;
    ENTER OTHER REFERENCES

    Rigaku/MSC and Rigaku Corporation. (2006).
    CrystalStructure (Version 3.8). 
    Single Crystal Structure Analysis Software.
    Rigaku/MSC, 9009 TX, USA 77381-5209.
    Rigaku, Tokyo 196-8666, Japan.

    Carruthers, J.R., Rollett,J.S., Betteridge, P.W.,
	 Kinna, D., Pearce, L., Larsen, A., and Gabe, E.(1999)
    CRYSTALS Issue 11, Chemical Crystallography Laboratory, Oxford, UK.

;
_publ_section_figure_captions
;
    ENTER FIGURE CAPTIONS
;
_publ_section_exptl_prep
;
    ENTER COMPOUND PREPARATION DETAILS
;
_publ_section_exptl_refinement
;
    ENTER SPECIAL DETAILS OF THE REFINEMENT
;

#==============================================================================

data___0674b

#==============================================================================

# CHEMICAL DATA

_chemical_formula_sum                  'C23 H24 B2 Br Cl7 N14 O Ru2 '
_chemical_formula_moiety               'C21 H22 B2 Br Cl N14 O Ru2, C2 H2 Cl6 '
_chemical_formula_weight               1064.37
_chemical_melting_point                ?

#==============================================================================

# CRYSTAL DATA
_symmetry_cell_setting                 monoclinic
_symmetry_space_group_name_H-M        'P 1 21/a 1'
_symmetry_space_group_name_Hall       '-P 2yab'
_symmetry_Int_Tables_number            14
loop_
_symmetry_equiv_pos_site_id
_symmetry_equiv_pos_as_xyz
1   '+X,+Y,+Z'
2   '1/2-X,1/2+Y,-Z'
3   '-X,-Y,-Z'
4   '1/2+X,1/2-Y,+Z'

#------------------------------------------------------------------------------

_cell_length_a                         15.8308(11)
_cell_length_b                         16.2176(9)
_cell_length_c                         16.1017(11)
_cell_angle_alpha                      90.0000
_cell_angle_beta                       107.9920(9)
_cell_angle_gamma                      90.0000
_cell_volume                           3931.8(4)
_cell_formula_units_Z                  4
_cell_measurement_reflns_used          7272
_cell_measurement_theta_min            3.2
_cell_measurement_theta_max            27.5
_cell_measurement_temperature          296.1

#------------------------------------------------------------------------------

_exptl_crystal_description            'block'
_exptl_crystal_colour                 'red'
_exptl_crystal_size_max                0.50
_exptl_crystal_size_mid                0.30
_exptl_crystal_size_min                0.10
_exptl_crystal_density_diffrn          1.798
_exptl_crystal_density_meas            ?
_exptl_crystal_density_method         'not measured'
_exptl_crystal_F_000                   2080.00
_exptl_absorpt_coefficient_mu          2.305
_exptl_absorpt_correction_type         multi-scan
_exptl_absorpt_process_details         
'Jacobson, R. (1998) Private communication'
_exptl_absorpt_correction_T_min        0.621
_exptl_absorpt_correction_T_max        0.794

#==============================================================================

# EXPERIMENTAL DATA

_diffrn_radiation_type                'Mo K\a'
_diffrn_radiation_wavelength           0.71070
_diffrn_measurement_device_type       'Rigaku Mercury'
_diffrn_measurement_method             \w
_diffrn_detector_area_resol_mean       7.31
_diffrn_reflns_number                  29076
_diffrn_reflns_av_R_equivalents        0.028
_diffrn_reflns_theta_max               27.48
_diffrn_measured_fraction_theta_max    0.968
_diffrn_reflns_theta_full              27.48
_diffrn_measured_fraction_theta_full   0.968
_diffrn_reflns_limit_h_min             -15
_diffrn_reflns_limit_h_max             20
_diffrn_reflns_limit_k_min             -21
_diffrn_reflns_limit_k_max             19
_diffrn_reflns_limit_l_min             -20
_diffrn_reflns_limit_l_max             10

#==============================================================================

# REFINEMENT DATA

_refine_special_details
;
    Refinement was performed using all reflections. The weighted 
    R-factor (wR) and goodness of fit (S) are based on F^2^.
    R-factor (gt) are based on F. The threshold expression of
    F^2^ > 2.0 sigma(F^2^) is used only for calculating R-factor (gt).
    The carbon atom in one of CHCl3 solvent molecules was disordered with 
    occupancy factors of 0.5/0.5.  The hydrogen atom of the disordered CHCl3 
    was not located.  
;
_reflns_number_total                   8733
_reflns_number_gt                      6898
_reflns_threshold_expression           F^2^>2.0\s(F^2^)
_refine_ls_structure_factor_coef       Fsqd
_refine_ls_R_factor_gt                 0.0628
_refine_ls_wR_factor_ref               0.1989
_refine_ls_hydrogen_treatment          mixed
_refine_ls_number_reflns               8733
_refine_ls_number_parameters           489
_refine_ls_goodness_of_fit_ref         1.000
_refine_ls_weighting_scheme            calc
_refine_ls_weighting_details
'w = 1/[0.0041Fo^2^ + 1.0000\s(Fo^2^)]/(4Fo^2^)'
_refine_ls_shift/su_max                0.0000
_refine_diff_density_max               2.24
_refine_diff_density_min               -1.04
_refine_ls_extinction_method           none
_refine_ls_extinction_coef             ?

loop_
_atom_type_symbol
_atom_type_description
_atom_type_scat_dispersion_real
_atom_type_scat_dispersion_imag
_atom_type_scat_source
  'C' 'C'  0.003 0.002 
;
International Tables for Crystallography
(1992, Vol. C, Tables 4.2.6.8 and 6.1.1.4)
;
  'H' 'H'  0.000 0.000 
;
International Tables for Crystallography
(1992, Vol. C, Table 6.1.1.4)
;
  'B' 'B'  0.001 0.001 
;
International Tables for Crystallography
(1992, Vol. C, Tables 4.2.6.8 and 6.1.1.4)
;
  'Br' 'Br'  -0.290 2.459 
;
International Tables for Crystallography
(1992, Vol. C, Tables 4.2.6.8 and 6.1.1.4)
;
  'N' 'N'  0.006 0.003 
;
International Tables for Crystallography
(1992, Vol. C, Tables 4.2.6.8 and 6.1.1.4)
;
  'O' 'O'  0.011 0.006 
;
International Tables for Crystallography
(1992, Vol. C, Tables 4.2.6.8 and 6.1.1.4)
;
  'Ru' 'Ru'  -1.259 0.836 
;
International Tables for Crystallography
(1992, Vol. C, Tables 4.2.6.8 and 6.1.1.4)
;
  'Cl' 'Cl'  0.148 0.159 
;
International Tables for Crystallography
(1992, Vol. C, Tables 4.2.6.8 and 6.1.1.4)
;

#==============================================================================

# ATOMIC COORDINATES AND THERMAL PARAMETERS

loop_
_atom_site_label
_atom_site_type_symbol
_atom_site_fract_x
_atom_site_fract_y
_atom_site_fract_z
_atom_site_U_iso_or_equiv
_atom_site_adp_type
_atom_site_occupancy
_atom_site_symmetry_multiplicity
_atom_site_calc_flag
_atom_site_refinement_flags
_atom_site_disorder_assembly
_atom_site_disorder_group
 Ru(1) Ru 0.12678(3) 0.13835(3) 0.75015(3) 0.03293(12) Uani 1.00 1 d . . .
 Ru(2) Ru 0.25607(3) -0.00199(3) 0.82496(3) 0.03279(12) Uani 1.00 1 d . . .
 Br(1) Br 0.31653(6) 0.08035(6) 0.48417(5) 0.0736(2) Uani 1.00 1 d . . .
 Cl(1) Cl 0.26203(9) 0.14095(8) 0.87693(10) 0.0392(3) Uani 1.00 1 d . . .
 Cl(2) Cl -0.0932(4) -0.0919(4) 0.7052(3) 0.231(2) Uani 1.00 1 d . . .
 Cl(3) Cl -0.0493(3) -0.0523(2) 0.8894(3) 0.1483(17) Uani 1.00 1 d . . .
 Cl(4) Cl 0.0327(3) -0.1817(3) 0.8311(3) 0.168(2) Uani 1.00 1 d . . .
 Cl(5) Cl -0.0147(2) 0.3946(2) 0.3490(4) 0.197(2) Uani 1.00 1 d . . .
 Cl(6) Cl 0.0116(2) 0.2565(2) 0.4655(2) 0.1360(14) Uani 1.00 1 d . . .
 Cl(7) Cl 0.1486(2) 0.3098(3) 0.4019(4) 0.195(2) Uani 1.00 1 d . . .
 O(1) O 0.1332(2) 0.0251(2) 0.7811(2) 0.0361(9) Uani 1.00 1 d . . .
 N(1) N 0.0131(3) 0.1233(3) 0.6493(3) 0.0428(13) Uani 1.00 1 d . . .
 N(2) N -0.0521(3) 0.1817(3) 0.6334(3) 0.0524(15) Uani 1.00 1 d . . .
 N(3) N 0.1229(3) 0.2627(3) 0.7123(3) 0.0456(14) Uani 1.00 1 d . . .
 N(4) N 0.0438(3) 0.3030(3) 0.6908(4) 0.0560(16) Uani 1.00 1 d . . .
 N(5) N 0.0462(3) 0.1736(3) 0.8231(3) 0.0438(13) Uani 1.00 1 d . . .
 N(6) N -0.0228(3) 0.2243(3) 0.7872(4) 0.0520(15) Uani 1.00 1 d . . .
 N(7) N 0.2377(3) -0.1183(3) 0.7764(3) 0.0430(13) Uani 1.00 1 d . . .
 N(8) N 0.2844(4) -0.1822(3) 0.8244(4) 0.0532(16) Uani 1.00 1 d . . .
 N(9) N 0.3922(3) -0.0286(3) 0.8676(3) 0.0426(13) Uani 1.00 1 d . . .
 N(10) N 0.4200(3) -0.1034(3) 0.9055(4) 0.0549(16) Uani 1.00 1 d . . .
 N(11) N 0.2536(3) -0.0521(3) 0.9434(3) 0.0433(13) Uani 1.00 1 d . . .
 N(12) N 0.2983(3) -0.1238(3) 0.9706(4) 0.0534(16) Uani 1.00 1 d . . .
 N(13) N 0.2062(3) 0.1071(2) 0.6764(3) 0.0365(11) Uani 1.00 1 d . . .
 N(14) N 0.2639(2) 0.0456(2) 0.7103(3) 0.0349(11) Uani 1.00 1 d . . .
 C(1) C -0.0173(4) 0.0633(4) 0.5910(4) 0.0528(18) Uani 1.00 1 d . . .
 C(2) C -0.1020(5) 0.0820(5) 0.5386(5) 0.070(2) Uani 1.00 1 d . . .
 C(3) C -0.1220(4) 0.1562(5) 0.5663(5) 0.067(2) Uani 1.00 1 d . . .
 C(4) C 0.1834(5) 0.3166(4) 0.7040(5) 0.058(2) Uani 1.00 1 d . . .
 C(5) C 0.1454(6) 0.3911(5) 0.6774(6) 0.074(2) Uani 1.00 1 d . . .
 C(6) C 0.0570(7) 0.3806(4) 0.6700(6) 0.086(3) Uani 1.00 1 d . . .
 C(7) C 0.0416(4) 0.1547(4) 0.9021(4) 0.0519(19) Uani 1.00 1 d . . .
 C(8) C -0.0311(5) 0.1922(5) 0.9162(5) 0.064(2) Uani 1.00 1 d . . .
 C(9) C -0.0677(4) 0.2364(4) 0.8456(6) 0.063(2) Uani 1.00 1 d . . .
 C(10) C 0.1872(4) -0.1487(4) 0.7018(4) 0.056(2) Uani 1.00 1 d . . .
 C(11) C 0.2003(6) -0.2353(5) 0.7001(6) 0.075(2) Uani 1.00 1 d . . .
 C(12) C 0.2619(6) -0.2523(4) 0.7775(7) 0.074(2) Uani 1.00 1 d . . .
 C(13) C 0.4653(4) 0.0135(4) 0.8681(5) 0.0540(19) Uani 1.00 1 d . . .
 C(14) C 0.5394(4) -0.0337(6) 0.9058(6) 0.071(2) Uani 1.00 1 d . . .
 C(15) C 0.5083(4) -0.1053(5) 0.9266(5) 0.066(2) Uani 1.00 1 d . . .
 C(16) C 0.2174(4) -0.0307(5) 1.0031(4) 0.057(2) Uani 1.00 1 d . . .
 C(17) C 0.2390(6) -0.0882(6) 1.0711(5) 0.078(2) Uani 1.00 1 d . . .
 C(18) C 0.2899(5) -0.1458(5) 1.0478(5) 0.069(2) Uani 1.00 1 d . . .
 C(19) C 0.2129(3) 0.1283(3) 0.5986(3) 0.0386(14) Uani 1.00 1 d . . .
 C(20) C 0.2766(4) 0.0776(4) 0.5823(4) 0.0445(16) Uani 1.00 1 d . . .
 C(21) C 0.3076(3) 0.0268(3) 0.6542(3) 0.0386(14) Uani 1.00 1 d . . .
 C(22) C -0.0199(9) -0.0790(8) 0.8002(8) 0.126(5) Uani 1.00 1 d . . .
 C(231) C 0.0615(16) 0.3400(19) 0.4442(15) 0.115(9) Uani 0.50 1 d P . .
 C(232) C 0.0383(16) 0.3066(14) 0.3872(17) 0.099(8) Uani 0.50 1 d P . .
 B(1) B -0.0389(5) 0.2570(5) 0.6940(6) 0.056(2) Uani 1.00 1 d . . .
 B(2) B 0.3491(5) -0.1651(5) 0.9149(6) 0.055(2) Uani 1.00 1 d . . .
 H(1) H -0.106(4) 0.295(3) 0.656(4) 0.045(17) Uiso 1.00 1 c . . .
 H(2) H 0.384(3) -0.215(3) 0.948(3) 0.036(15) Uiso 1.00 1 c . . .
 H(3) H 0.0153 0.0139 0.5862 0.061 Uiso 1.00 1 c R . .
 H(4) H -0.1396 0.0488 0.4915 0.079 Uiso 1.00 1 c R . .
 H(5) H -0.1773 0.1860 0.5421 0.075 Uiso 1.00 1 c R . .
 H(6) H 0.2460 0.3043 0.7155 0.068 Uiso 1.00 1 c R . .
 H(7) H 0.1742 0.4408 0.6662 0.088 Uiso 1.00 1 c R . .
 H(8) H 0.0116 0.4229 0.6523 0.096 Uiso 1.00 1 c R . .
 H(9) H 0.0835 0.1195 0.9439 0.065 Uiso 1.00 1 c R . .
 H(10) H -0.0510 0.1871 0.9672 0.082 Uiso 1.00 1 c R . .
 H(11) H -0.1189 0.2721 0.8367 0.077 Uiso 1.00 1 c R . .
 H(12) H 0.1470 -0.1168 0.6551 0.064 Uiso 1.00 1 c R . .
 H(13) H 0.1716 -0.2737 0.6537 0.089 Uiso 1.00 1 c R . .
 H(14) H 0.2863 -0.3065 0.7964 0.092 Uiso 1.00 1 c R . .
 H(15) H 0.4658 0.0688 0.8454 0.064 Uiso 1.00 1 c R . .
 H(16) H 0.6010 -0.0186 0.9153 0.082 Uiso 1.00 1 c R . .
 H(17) H 0.5450 -0.1520 0.9533 0.077 Uiso 1.00 1 c R . .
 H(18) H 0.1810 0.0180 1.0005 0.070 Uiso 1.00 1 c R . .
 H(19) H 0.2214 -0.0872 1.1237 0.094 Uiso 1.00 1 c R . .
 H(20) H 0.3156 -0.1943 1.0813 0.080 Uiso 1.00 1 c R . .
 H(21) H 0.1795 0.1712 0.5605 0.046 Uiso 1.00 1 c R . .
 H(22) H 0.3532 -0.0151 0.6624 0.048 Uiso 1.00 1 c R . .
 H(23) H 0.0249 -0.0406 0.7942 0.157 Uiso 1.00 1 c R . .


loop_
_atom_site_aniso_label
_atom_site_aniso_U_11
_atom_site_aniso_U_22
_atom_site_aniso_U_33
_atom_site_aniso_U_12
_atom_site_aniso_U_13
_atom_site_aniso_U_23
 Ru(1) 0.0291(2) 0.0329(2) 0.0367(2) 0.00383(16) 0.01004(18) 0.00265(17)
 Ru(2) 0.0294(2) 0.0325(2) 0.0359(2) 0.00261(16) 0.00924(18) 0.00485(17)
 Br(1) 0.0870(6) 0.0983(6) 0.0481(4) -0.0056(4) 0.0392(4) -0.0041(4)
 Cl(1) 0.0351(6) 0.0369(6) 0.0448(7) -0.0045(5) 0.0111(5) -0.0024(5)
 Cl(2) 0.239(5) 0.287(7) 0.129(3) -0.155(5) 0.005(3) 0.055(4)
 Cl(3) 0.181(4) 0.141(3) 0.154(3) -0.028(2) 0.098(3) -0.015(2)
 Cl(4) 0.223(5) 0.144(3) 0.172(4) -0.014(3) 0.111(4) -0.007(3)
 Cl(5) 0.107(2) 0.129(3) 0.332(7) -0.002(2) 0.034(3) 0.115(4)
 Cl(6) 0.103(2) 0.175(3) 0.126(2) -0.004(2) 0.0285(19) 0.063(2)
 Cl(7) 0.109(2) 0.153(3) 0.349(8) 0.010(2) 0.106(4) 0.079(4)
 O(1) 0.0312(18) 0.0391(19) 0.038(2) -0.0008(15) 0.0105(15) 0.0010(17)
 N(1) 0.030(2) 0.050(2) 0.044(2) 0.004(2) 0.005(2) 0.004(2)
 N(2) 0.036(2) 0.059(3) 0.054(3) 0.012(2) 0.003(2) 0.008(2)
 N(3) 0.042(2) 0.041(2) 0.050(3) 0.010(2) 0.008(2) 0.006(2)
 N(4) 0.054(3) 0.038(2) 0.070(4) 0.017(2) 0.010(2) 0.011(2)
 N(5) 0.034(2) 0.044(2) 0.056(3) 0.007(2) 0.019(2) -0.005(2)
 N(6) 0.038(2) 0.053(3) 0.064(3) 0.016(2) 0.014(2) -0.002(2)
 N(7) 0.039(2) 0.033(2) 0.056(3) 0.007(2) 0.013(2) 0.002(2)
 N(8) 0.060(3) 0.034(2) 0.062(3) 0.010(2) 0.014(2) 0.008(2)
 N(9) 0.035(2) 0.047(2) 0.044(2) 0.009(2) 0.009(2) 0.004(2)
 N(10) 0.043(2) 0.051(3) 0.063(3) 0.019(2) 0.006(2) 0.007(2)
 N(11) 0.042(2) 0.041(2) 0.044(2) -0.002(2) 0.008(2) 0.007(2)
 N(12) 0.057(3) 0.046(3) 0.054(3) 0.005(2) 0.012(2) 0.021(2)
 N(13) 0.035(2) 0.036(2) 0.039(2) 0.0079(18) 0.0124(19) 0.003(2)
 N(14) 0.033(2) 0.032(2) 0.041(2) 0.0031(17) 0.0143(19) -0.0019(19)
 C(1) 0.050(3) 0.060(4) 0.043(3) -0.008(3) 0.006(2) -0.006(3)
 C(2) 0.057(4) 0.085(6) 0.056(4) -0.018(4) -0.001(3) 0.005(4)
 C(3) 0.039(3) 0.085(5) 0.064(4) 0.007(3) -0.002(3) 0.021(4)
 C(4) 0.060(4) 0.049(3) 0.060(4) -0.013(3) 0.012(3) 0.011(3)
 C(5) 0.078(5) 0.045(4) 0.097(6) -0.009(3) 0.023(5) 0.011(4)
 C(6) 0.122(8) 0.038(3) 0.080(6) 0.021(4) 0.006(5) 0.002(4)
 C(7) 0.051(3) 0.060(4) 0.052(3) -0.002(3) 0.024(3) -0.007(3)
 C(8) 0.061(4) 0.071(4) 0.072(5) -0.005(3) 0.041(4) -0.021(4)
 C(9) 0.042(3) 0.063(4) 0.088(5) 0.002(3) 0.026(3) -0.031(4)
 C(10) 0.048(3) 0.062(4) 0.049(4) 0.001(3) 0.003(3) -0.008(3)
 C(11) 0.078(5) 0.063(4) 0.082(6) -0.007(4) 0.020(4) -0.029(4)
 C(12) 0.077(5) 0.034(3) 0.119(8) 0.003(3) 0.040(5) -0.008(4)
 C(13) 0.036(3) 0.060(4) 0.064(4) -0.002(2) 0.013(3) 0.000(3)
 C(14) 0.037(3) 0.087(5) 0.081(5) 0.007(3) 0.006(3) -0.010(4)
 C(15) 0.045(3) 0.071(5) 0.077(5) 0.017(3) 0.009(3) 0.009(4)
 C(16) 0.052(3) 0.079(4) 0.044(3) 0.009(3) 0.020(3) 0.019(3)
 C(17) 0.076(5) 0.098(6) 0.062(5) 0.010(4) 0.023(4) 0.042(4)
 C(18) 0.064(4) 0.071(5) 0.066(5) 0.000(3) 0.012(3) 0.038(4)
 C(19) 0.041(2) 0.042(3) 0.031(2) -0.002(2) 0.010(2) 0.003(2)
 C(20) 0.049(3) 0.051(3) 0.037(3) -0.014(2) 0.019(2) -0.008(2)
 C(21) 0.040(2) 0.042(2) 0.037(3) -0.001(2) 0.017(2) -0.005(2)
 C(22) 0.140(10) 0.149(11) 0.104(8) -0.094(9) 0.061(8) -0.030(8)
 C(231) 0.097(16) 0.17(2) 0.071(13) -0.048(16) 0.007(11) -0.058(16)
 C(232) 0.108(17) 0.077(13) 0.113(19) 0.028(11) 0.032(15) 0.027(13)
 B(1) 0.044(3) 0.053(4) 0.066(5) 0.019(3) 0.009(3) 0.003(3)
 B(2) 0.055(4) 0.040(3) 0.066(5) 0.010(3) 0.012(3) 0.012(3)

#==============================================================================

_computing_data_collection            'CrystalClear'
_computing_cell_refinement            'CrystalClear'
_computing_data_reduction             'CrystalStructure'
_computing_structure_solution         'SIR2004'
_computing_structure_refinement       'CRYSTALS'
_computing_publication_material       'CrystalStructure 3.8'
_computing_molecular_graphics          ?

#==============================================================================

# MOLECULAR GEOMETRY

_geom_special_details
;
    ENTER SPECIAL DETAILS OF THE MOLECULAR GEOMETRY
;

loop_
_geom_bond_atom_site_label_1
_geom_bond_atom_site_label_2
_geom_bond_distance
_geom_bond_publ_flag
_geom_bond_site_symmetry_1
_geom_bond_site_symmetry_2
Ru(1) Cl(1) 2.4603(13) yes . .
Ru(1) O(1) 1.898(4) yes . .
Ru(1) N(1) 2.032(4) yes . .
Ru(1) N(3) 2.102(5) yes . .
Ru(1) N(5) 2.063(6) yes . .
Ru(1) N(13) 2.042(5) yes . .
Ru(2) Cl(1) 2.4565(14) yes . .
Ru(2) O(1) 1.904(3) yes . .
Ru(2) N(7) 2.029(4) yes . .
Ru(2) N(9) 2.095(4) yes . .
Ru(2) N(11) 2.085(5) yes . .
Ru(2) N(14) 2.040(5) yes . .
Br(1) C(20) 1.875(7) yes . .
Cl(2) C(22) 1.622(12) yes . .
Cl(3) C(22) 1.697(16) yes . .
Cl(4) C(22) 1.859(14) yes . .
Cl(5) C(231) 1.86(2) yes . .
Cl(5) C(232) 1.67(2) yes . .
Cl(6) C(231) 1.66(3) yes . .
Cl(6) C(232) 1.66(2) yes . .
Cl(7) C(231) 1.79(2) yes . .
Cl(7) C(232) 1.69(2) yes . .
N(1) N(2) 1.366(7) yes . .
N(1) C(1) 1.335(8) yes . .
N(2) C(3) 1.351(8) yes . .
N(2) B(1) 1.536(10) yes . .
N(3) N(4) 1.358(7) yes . .
N(3) C(4) 1.334(9) yes . .
N(4) C(6) 1.336(10) yes . .
N(4) B(1) 1.522(10) yes . .
N(5) N(6) 1.347(7) yes . .
N(5) C(7) 1.333(10) yes . .
N(6) C(9) 1.355(12) yes . .
N(6) B(1) 1.537(11) yes . .
N(7) N(8) 1.365(7) yes . .
N(7) C(10) 1.316(8) yes . .
N(8) C(12) 1.351(10) yes . .
N(8) B(2) 1.526(9) yes . .
N(9) N(10) 1.368(7) yes . .
N(9) C(13) 1.341(8) yes . .
N(10) C(15) 1.332(9) yes . .
N(10) B(2) 1.545(11) yes . .
N(11) N(12) 1.362(7) yes . .
N(11) C(16) 1.308(10) yes . .
N(12) C(18) 1.340(11) yes . .
N(12) B(2) 1.531(12) yes . .
N(13) N(14) 1.350(6) yes . .
N(13) C(19) 1.335(8) yes . .
N(14) C(21) 1.331(8) yes . .
C(1) C(2) 1.380(9) yes . .
C(2) C(3) 1.354(13) yes . .
C(4) C(5) 1.359(10) yes . .
C(5) C(6) 1.377(16) yes . .
C(7) C(8) 1.381(12) yes . .
C(8) C(9) 1.318(11) yes . .
C(10) C(11) 1.422(11) yes . .
C(11) C(12) 1.353(12) yes . .
C(13) C(14) 1.375(10) yes . .
C(14) C(15) 1.344(13) yes . .
C(16) C(17) 1.398(12) yes . .
C(17) C(18) 1.359(14) yes . .
C(19) C(20) 1.387(9) yes . .
C(20) C(21) 1.382(8) yes . .
C(231) C(232) 1.03(3) yes . .
C(1) H(3) 0.970 no . .
C(2) H(4) 0.970 no . .
C(3) H(5) 0.970 no . .
C(4) H(6) 0.970 no . .
C(5) H(7) 0.970 no . .
C(6) H(8) 0.970 no . .
C(7) H(9) 0.970 no . .
C(8) H(10) 0.970 no . .
C(9) H(11) 0.970 no . .
C(10) H(12) 0.970 no . .
C(11) H(13) 0.970 no . .
C(12) H(14) 0.970 no . .
C(13) H(15) 0.970 no . .
C(14) H(16) 0.970 no . .
C(15) H(17) 0.970 no . .
C(16) H(18) 0.970 no . .
C(17) H(19) 0.970 no . .
C(18) H(20) 0.970 no . .
C(19) H(21) 0.970 no . .
C(21) H(22) 0.970 no . .
C(22) H(23) 0.970 no . .
B(1) H(1) 1.22(5) no . .
B(2) H(2) 1.03(5) no . .

loop_
_geom_angle_atom_site_label_1
_geom_angle_atom_site_label_2
_geom_angle_atom_site_label_3
_geom_angle
_geom_angle_publ_flag
_geom_angle_site_symmetry_1
_geom_angle_site_symmetry_2
_geom_angle_site_symmetry_3
Cl(1) Ru(1) O(1) 80.59(10) yes . . .
Cl(1) Ru(1) N(1) 173.71(15) yes . . .
Cl(1) Ru(1) N(3) 99.47(12) yes . . .
Cl(1) Ru(1) N(5) 93.18(13) yes . . .
Cl(1) Ru(1) N(13) 87.29(12) yes . . .
O(1) Ru(1) N(1) 93.21(18) yes . . .
O(1) Ru(1) N(3) 177.5(2) yes . . .
O(1) Ru(1) N(5) 96.4(2) yes . . .
O(1) Ru(1) N(13) 85.37(19) yes . . .
N(1) Ru(1) N(3) 86.77(19) yes . . .
N(1) Ru(1) N(5) 86.4(2) yes . . .
N(1) Ru(1) N(13) 93.3(2) yes . . .
N(3) Ru(1) N(5) 86.1(2) yes . . .
N(3) Ru(1) N(13) 92.2(2) yes . . .
N(5) Ru(1) N(13) 178.22(19) yes . . .
Cl(1) Ru(2) O(1) 80.58(12) yes . . .
Cl(1) Ru(2) N(7) 174.17(14) yes . . .
Cl(1) Ru(2) N(9) 98.95(14) yes . . .
Cl(1) Ru(2) N(11) 93.76(14) yes . . .
Cl(1) Ru(2) N(14) 86.83(13) yes . . .
O(1) Ru(2) N(7) 93.59(18) yes . . .
O(1) Ru(2) N(9) 177.0(2) yes . . .
O(1) Ru(2) N(11) 97.10(19) yes . . .
O(1) Ru(2) N(14) 85.27(18) yes . . .
N(7) Ru(2) N(9) 86.9(2) yes . . .
N(7) Ru(2) N(11) 87.1(2) yes . . .
N(7) Ru(2) N(14) 92.6(2) yes . . .
N(9) Ru(2) N(11) 85.9(2) yes . . .
N(9) Ru(2) N(14) 91.8(2) yes . . .
N(11) Ru(2) N(14) 177.62(18) yes . . .
Ru(1) Cl(1) Ru(2) 76.65(4) yes . . .
C(231) Cl(5) C(232) 33.5(12) yes . . .
C(231) Cl(6) C(232) 36.2(12) yes . . .
C(231) Cl(7) C(232) 34.4(11) yes . . .
Ru(1) O(1) Ru(2) 106.65(19) yes . . .
Ru(1) N(1) N(2) 119.9(3) yes . . .
Ru(1) N(1) C(1) 133.5(4) yes . . .
N(2) N(1) C(1) 106.6(4) yes . . .
N(1) N(2) C(3) 108.9(6) yes . . .
N(1) N(2) B(1) 119.0(4) yes . . .
C(3) N(2) B(1) 131.9(6) yes . . .
Ru(1) N(3) N(4) 118.6(4) yes . . .
Ru(1) N(3) C(4) 134.4(4) yes . . .
N(4) N(3) C(4) 107.0(5) yes . . .
N(3) N(4) C(6) 108.3(7) yes . . .
N(3) N(4) B(1) 119.3(5) yes . . .
C(6) N(4) B(1) 132.4(7) yes . . .
Ru(1) N(5) N(6) 119.2(4) yes . . .
Ru(1) N(5) C(7) 134.9(4) yes . . .
N(6) N(5) C(7) 105.9(5) yes . . .
N(5) N(6) C(9) 108.7(5) yes . . .
N(5) N(6) B(1) 119.8(6) yes . . .
C(9) N(6) B(1) 131.5(5) yes . . .
Ru(2) N(7) N(8) 119.9(3) yes . . .
Ru(2) N(7) C(10) 132.4(4) yes . . .
N(8) N(7) C(10) 107.7(5) yes . . .
N(7) N(8) C(12) 108.6(5) yes . . .
N(7) N(8) B(2) 119.3(5) yes . . .
C(12) N(8) B(2) 132.1(6) yes . . .
Ru(2) N(9) N(10) 119.1(4) yes . . .
Ru(2) N(9) C(13) 134.1(4) yes . . .
N(10) N(9) C(13) 106.8(5) yes . . .
N(9) N(10) C(15) 107.6(6) yes . . .
N(9) N(10) B(2) 118.3(5) yes . . .
C(15) N(10) B(2) 134.1(6) yes . . .
Ru(2) N(11) N(12) 118.1(4) yes . . .
Ru(2) N(11) C(16) 134.8(4) yes . . .
N(12) N(11) C(16) 107.1(5) yes . . .
N(11) N(12) C(18) 109.5(6) yes . . .
N(11) N(12) B(2) 120.1(6) yes . . .
C(18) N(12) B(2) 130.4(6) yes . . .
Ru(1) N(13) N(14) 114.2(3) yes . . .
Ru(1) N(13) C(19) 136.4(3) yes . . .
N(14) N(13) C(19) 109.2(5) yes . . .
Ru(2) N(14) N(13) 115.0(4) yes . . .
Ru(2) N(14) C(21) 135.8(3) yes . . .
N(13) N(14) C(21) 108.9(4) yes . . .
N(1) C(1) C(2) 110.0(6) yes . . .
C(1) C(2) C(3) 106.0(6) yes . . .
N(2) C(3) C(2) 108.6(6) yes . . .
N(3) C(4) C(5) 110.6(7) yes . . .
C(4) C(5) C(6) 104.9(7) yes . . .
N(4) C(6) C(5) 109.1(8) yes . . .
N(5) C(7) C(8) 110.5(6) yes . . .
C(7) C(8) C(9) 105.3(8) yes . . .
N(6) C(9) C(8) 109.6(7) yes . . .
N(7) C(10) C(11) 109.6(6) yes . . .
C(10) C(11) C(12) 104.6(7) yes . . .
N(8) C(12) C(11) 109.5(6) yes . . .
N(9) C(13) C(14) 109.7(6) yes . . .
C(13) C(14) C(15) 105.1(6) yes . . .
N(10) C(15) C(14) 110.7(7) yes . . .
N(11) C(16) C(17) 110.0(7) yes . . .
C(16) C(17) C(18) 105.4(8) yes . . .
N(12) C(18) C(17) 108.1(7) yes . . .
N(13) C(19) C(20) 107.4(5) yes . . .
Br(1) C(20) C(19) 126.8(4) yes . . .
Br(1) C(20) C(21) 126.5(5) yes . . .
C(19) C(20) C(21) 106.6(6) yes . . .
N(14) C(21) C(20) 107.9(5) yes . . .
Cl(2) C(22) Cl(3) 121.8(9) yes . . .
Cl(2) C(22) Cl(4) 105.5(7) yes . . .
Cl(3) C(22) Cl(4) 102.6(7) yes . . .
Cl(5) C(231) Cl(6) 109.3(12) yes . . .
Cl(5) C(231) Cl(7) 101.4(13) yes . . .
Cl(5) C(231) C(232) 63.5(17) yes . . .
Cl(6) C(231) Cl(7) 109.2(17) yes . . .
Cl(6) C(231) C(232) 72(2) yes . . .
Cl(7) C(231) C(232) 68(2) yes . . .
Cl(5) C(232) Cl(6) 118.7(17) yes . . .
Cl(5) C(232) Cl(7) 113.9(15) yes . . .
Cl(5) C(232) C(231) 83(2) yes . . .
Cl(6) C(232) Cl(7) 113.8(13) yes . . .
Cl(6) C(232) C(231) 72(2) yes . . .
Cl(7) C(232) C(231) 78(2) yes . . .
N(2) B(1) N(4) 108.6(7) yes . . .
N(2) B(1) N(6) 107.2(6) yes . . .
N(4) B(1) N(6) 108.5(5) yes . . .
N(8) B(2) N(10) 108.5(6) yes . . .
N(8) B(2) N(12) 108.6(6) yes . . .
N(10) B(2) N(12) 107.7(5) yes . . .
N(1) C(1) H(3) 125.0 no . . .
C(2) C(1) H(3) 125.0 no . . .
C(1) C(2) H(4) 127.0 no . . .
C(3) C(2) H(4) 127.0 no . . .
N(2) C(3) H(5) 125.7 no . . .
C(2) C(3) H(5) 125.7 no . . .
N(3) C(4) H(6) 124.7 no . . .
C(5) C(4) H(6) 124.7 no . . .
C(4) C(5) H(7) 127.5 no . . .
C(6) C(5) H(7) 127.5 no . . .
N(4) C(6) H(8) 125.4 no . . .
C(5) C(6) H(8) 125.4 no . . .
N(5) C(7) H(9) 124.8 no . . .
C(8) C(7) H(9) 124.8 no . . .
C(7) C(8) H(10) 127.3 no . . .
C(9) C(8) H(10) 127.3 no . . .
N(6) C(9) H(11) 125.2 no . . .
C(8) C(9) H(11) 125.2 no . . .
N(7) C(10) H(12) 125.2 no . . .
C(11) C(10) H(12) 125.2 no . . .
C(10) C(11) H(13) 127.7 no . . .
C(12) C(11) H(13) 127.7 no . . .
N(8) C(12) H(14) 125.2 no . . .
C(11) C(12) H(14) 125.2 no . . .
N(9) C(13) H(15) 125.2 no . . .
C(14) C(13) H(15) 125.1 no . . .
C(13) C(14) H(16) 127.4 no . . .
C(15) C(14) H(16) 127.4 no . . .
N(10) C(15) H(17) 124.6 no . . .
C(14) C(15) H(17) 124.6 no . . .
N(11) C(16) H(18) 125.0 no . . .
C(17) C(16) H(18) 125.0 no . . .
C(16) C(17) H(19) 127.3 no . . .
C(18) C(17) H(19) 127.3 no . . .
N(12) C(18) H(20) 126.0 no . . .
C(17) C(18) H(20) 126.0 no . . .
N(13) C(19) H(21) 126.3 no . . .
C(20) C(19) H(21) 126.3 no . . .
N(14) C(21) H(22) 126.1 no . . .
C(20) C(21) H(22) 126.1 no . . .
Cl(2) C(22) H(23) 108.7 no . . .
Cl(3) C(22) H(23) 108.7 no . . .
Cl(4) C(22) H(23) 108.7 no . . .
N(2) B(1) H(1) 99(2) no . . .
N(4) B(1) H(1) 111(3) no . . .
N(6) B(1) H(1) 121(3) no . . .
N(8) B(2) H(2) 117(3) no . . .
N(10) B(2) H(2) 106(3) no . . .
N(12) B(2) H(2) 109(3) no . . .

loop_
_geom_torsion_atom_site_label_1
_geom_torsion_atom_site_label_2
_geom_torsion_atom_site_label_3
_geom_torsion_atom_site_label_4
_geom_torsion
_geom_torsion_publ_flag
_geom_torsion_site_symmetry_1
_geom_torsion_site_symmetry_2
_geom_torsion_site_symmetry_3
_geom_torsion_site_symmetry_4
Cl(1) Ru(1) O(1) Ru(2) -33.89(16) ? . . . .
O(1) Ru(1) Cl(1) Ru(2) 25.19(14) ? . . . .
Cl(1) Ru(1) N(1) N(2) 130.9(13) ? . . . .
Cl(1) Ru(1) N(1) C(1) -46(2) ? . . . .
N(1) Ru(1) Cl(1) Ru(2) 35.0(16) ? . . . .
Cl(1) Ru(1) N(3) N(4) -135.8(4) ? . . . .
Cl(1) Ru(1) N(3) C(4) 43.4(7) ? . . . .
N(3) Ru(1) Cl(1) Ru(2) -152.30(17) ? . . . .
Cl(1) Ru(1) N(5) N(6) 143.6(4) ? . . . .
Cl(1) Ru(1) N(5) C(7) -40.6(6) ? . . . .
N(5) Ru(1) Cl(1) Ru(2) 121.15(15) ? . . . .
Cl(1) Ru(1) N(13) N(14) 47.9(3) ? . . . .
Cl(1) Ru(1) N(13) C(19) -137.4(5) ? . . . .
N(13) Ru(1) Cl(1) Ru(2) -60.57(13) ? . . . .
O(1) Ru(1) N(1) N(2) 140.6(5) ? . . . .
O(1) Ru(1) N(1) C(1) -36.7(7) ? . . . .
N(1) Ru(1) O(1) Ru(2) 147.2(2) ? . . . .
O(1) Ru(1) N(3) N(4) 133(3) ? . . . .
O(1) Ru(1) N(3) C(4) -48(4) ? . . . .
N(3) Ru(1) O(1) Ru(2) 58(3) ? . . . .
O(1) Ru(1) N(5) N(6) -135.6(4) ? . . . .
O(1) Ru(1) N(5) C(7) 40.3(6) ? . . . .
N(5) Ru(1) O(1) Ru(2) -126.1(2) ? . . . .
O(1) Ru(1) N(13) N(14) -32.9(3) ? . . . .
O(1) Ru(1) N(13) C(19) 141.8(5) ? . . . .
N(13) Ru(1) O(1) Ru(2) 54.1(2) ? . . . .
N(1) Ru(1) N(3) N(4) 43.4(5) ? . . . .
N(1) Ru(1) N(3) C(4) -137.4(7) ? . . . .
N(3) Ru(1) N(1) N(2) -41.9(5) ? . . . .
N(3) Ru(1) N(1) C(1) 140.8(7) ? . . . .
N(1) Ru(1) N(5) N(6) -42.7(4) ? . . . .
N(1) Ru(1) N(5) C(7) 133.1(6) ? . . . .
N(5) Ru(1) N(1) N(2) 44.4(5) ? . . . .
N(5) Ru(1) N(1) C(1) -132.9(7) ? . . . .
N(1) Ru(1) N(13) N(14) -125.8(3) ? . . . .
N(1) Ru(1) N(13) C(19) 48.9(5) ? . . . .
N(13) Ru(1) N(1) N(2) -133.9(5) ? . . . .
N(13) Ru(1) N(1) C(1) 48.9(7) ? . . . .
N(3) Ru(1) N(5) N(6) 44.3(4) ? . . . .
N(3) Ru(1) N(5) C(7) -139.9(6) ? . . . .
N(5) Ru(1) N(3) N(4) -43.2(4) ? . . . .
N(5) Ru(1) N(3) C(4) 136.0(7) ? . . . .
N(3) Ru(1) N(13) N(14) 147.3(3) ? . . . .
N(3) Ru(1) N(13) C(19) -38.0(5) ? . . . .
N(13) Ru(1) N(3) N(4) 136.6(4) ? . . . .
N(13) Ru(1) N(3) C(4) -44.2(6) ? . . . .
N(5) Ru(1) N(13) N(14) 153(5) ? . . . .
N(5) Ru(1) N(13) C(19) -32(5) ? . . . .
N(13) Ru(1) N(5) N(6) 38(5) ? . . . .
N(13) Ru(1) N(5) C(7) -146(5) ? . . . .
Cl(1) Ru(2) O(1) Ru(1) 33.96(16) ? . . . .
O(1) Ru(2) Cl(1) Ru(1) -25.10(13) ? . . . .
Cl(1) Ru(2) N(7) N(8) -141.9(14) ? . . . .
Cl(1) Ru(2) N(7) C(10) 39(2) ? . . . .
N(7) Ru(2) Cl(1) Ru(1) -23.6(18) ? . . . .
Cl(1) Ru(2) N(9) N(10) 137.5(4) ? . . . .
Cl(1) Ru(2) N(9) C(13) -41.4(7) ? . . . .
N(9) Ru(2) Cl(1) Ru(1) 151.91(16) ? . . . .
Cl(1) Ru(2) N(11) N(12) -143.2(3) ? . . . .
Cl(1) Ru(2) N(11) C(16) 36.7(6) ? . . . .
N(11) Ru(2) Cl(1) Ru(1) -121.69(14) ? . . . .
Cl(1) Ru(2) N(14) N(13) -49.6(3) ? . . . .
Cl(1) Ru(2) N(14) C(21) 137.5(5) ? . . . .
N(14) Ru(2) Cl(1) Ru(1) 60.62(12) ? . . . .
O(1) Ru(2) N(7) N(8) -140.4(5) ? . . . .
O(1) Ru(2) N(7) C(10) 40.8(7) ? . . . .
N(7) Ru(2) O(1) Ru(1) -145.9(2) ? . . . .
O(1) Ru(2) N(9) N(10) -142(3) ? . . . .
O(1) Ru(2) N(9) C(13) 39(4) ? . . . .
N(9) Ru(2) O(1) Ru(1) -47(3) ? . . . .
O(1) Ru(2) N(11) N(12) 135.9(4) ? . . . .
O(1) Ru(2) N(11) C(16) -44.3(6) ? . . . .
N(11) Ru(2) O(1) Ru(1) 126.6(2) ? . . . .
O(1) Ru(2) N(14) N(13) 31.2(3) ? . . . .
O(1) Ru(2) N(14) C(21) -141.7(5) ? . . . .
N(14) Ru(2) O(1) Ru(1) -53.6(2) ? . . . .
N(7) Ru(2) N(9) N(10) -43.0(5) ? . . . .
N(7) Ru(2) N(9) C(13) 138.2(7) ? . . . .
N(9) Ru(2) N(7) N(8) 42.6(5) ? . . . .
N(9) Ru(2) N(7) C(10) -136.2(7) ? . . . .
N(7) Ru(2) N(11) N(12) 42.6(4) ? . . . .
N(7) Ru(2) N(11) C(16) -137.5(6) ? . . . .
N(11) Ru(2) N(7) N(8) -43.5(5) ? . . . .
N(11) Ru(2) N(7) C(10) 137.8(7) ? . . . .
N(7) Ru(2) N(14) N(13) 124.6(3) ? . . . .
N(7) Ru(2) N(14) C(21) -48.3(5) ? . . . .
N(14) Ru(2) N(7) N(8) 134.2(5) ? . . . .
N(14) Ru(2) N(7) C(10) -44.6(7) ? . . . .
N(9) Ru(2) N(11) N(12) -44.5(4) ? . . . .
N(9) Ru(2) N(11) C(16) 135.4(6) ? . . . .
N(11) Ru(2) N(9) N(10) 44.3(4) ? . . . .
N(11) Ru(2) N(9) C(13) -134.5(7) ? . . . .
N(9) Ru(2) N(14) N(13) -148.5(3) ? . . . .
N(9) Ru(2) N(14) C(21) 38.6(5) ? . . . .
N(14) Ru(2) N(9) N(10) -135.5(4) ? . . . .
N(14) Ru(2) N(9) C(13) 45.7(7) ? . . . .
N(11) Ru(2) N(14) N(13) -154(4) ? . . . .
N(11) Ru(2) N(14) C(21) 33(4) ? . . . .
N(14) Ru(2) N(11) N(12) -39(4) ? . . . .
N(14) Ru(2) N(11) C(16) 141(4) ? . . . .
C(231) Cl(5) C(232) Cl(6) 65(2) ? . . . .
C(231) Cl(5) C(232) Cl(7) -73(2) ? . . . .
C(232) Cl(5) C(231) Cl(6) -57(2) ? . . . .
C(232) Cl(5) C(231) Cl(7) 58(2) ? . . . .
C(231) Cl(6) C(232) Cl(5) -71(2) ? . . . .
C(231) Cl(6) C(232) Cl(7) 67(2) ? . . . .
C(232) Cl(6) C(231) Cl(5) 52.4(17) ? . . . .
C(232) Cl(6) C(231) Cl(7) -57.7(19) ? . . . .
C(231) Cl(7) C(232) Cl(5) 77(2) ? . . . .
C(231) Cl(7) C(232) Cl(6) -64(2) ? . . . .
C(232) Cl(7) C(231) Cl(5) -54.9(17) ? . . . .
C(232) Cl(7) C(231) Cl(6) 60(2) ? . . . .
Ru(1) N(1) N(2) C(3) -177.2(5) ? . . . .
Ru(1) N(1) N(2) B(1) -1.5(8) ? . . . .
Ru(1) N(1) C(1) C(2) 176.6(6) ? . . . .
N(2) N(1) C(1) C(2) -0.9(8) ? . . . .
C(1) N(1) N(2) C(3) 0.8(8) ? . . . .
C(1) N(1) N(2) B(1) 176.4(6) ? . . . .
N(1) N(2) C(3) C(2) -0.4(9) ? . . . .
N(1) N(2) B(1) N(4) 59.8(8) ? . . . .
N(1) N(2) B(1) N(6) -57.2(8) ? . . . .
C(3) N(2) B(1) N(4) -125.7(8) ? . . . .
C(3) N(2) B(1) N(6) 117.3(8) ? . . . .
B(1) N(2) C(3) C(2) -175.3(8) ? . . . .
Ru(1) N(3) N(4) C(6) 179.4(5) ? . . . .
Ru(1) N(3) N(4) B(1) -0.7(8) ? . . . .
Ru(1) N(3) C(4) C(5) -179.5(6) ? . . . .
N(4) N(3) C(4) C(5) -0.2(6) ? . . . .
C(4) N(3) N(4) C(6) -0.0(7) ? . . . .
C(4) N(3) N(4) B(1) 179.9(5) ? . . . .
N(3) N(4) C(6) C(5) 0.3(8) ? . . . .
N(3) N(4) B(1) N(2) -57.5(8) ? . . . .
N(3) N(4) B(1) N(6) 58.6(8) ? . . . .
C(6) N(4) B(1) N(2) 122.4(9) ? . . . .
C(6) N(4) B(1) N(6) -121.4(9) ? . . . .
B(1) N(4) C(6) C(5) -179.7(5) ? . . . .
Ru(1) N(5) N(6) C(9) 177.8(4) ? . . . .
Ru(1) N(5) N(6) B(1) -1.8(7) ? . . . .
Ru(1) N(5) C(7) C(8) -175.3(5) ? . . . .
N(6) N(5) C(7) C(8) 1.0(7) ? . . . .
C(7) N(5) N(6) C(9) 0.9(6) ? . . . .
C(7) N(5) N(6) B(1) -178.7(5) ? . . . .
N(5) N(6) C(9) C(8) -2.5(8) ? . . . .
N(5) N(6) B(1) N(2) 59.1(7) ? . . . .
N(5) N(6) B(1) N(4) -58.0(8) ? . . . .
C(9) N(6) B(1) N(2) -120.4(7) ? . . . .
C(9) N(6) B(1) N(4) 122.6(7) ? . . . .
B(1) N(6) C(9) C(8) 177.1(6) ? . . . .
Ru(2) N(7) N(8) C(12) -178.7(6) ? . . . .
Ru(2) N(7) N(8) B(2) 0.8(9) ? . . . .
Ru(2) N(7) C(10) C(11) 179.1(6) ? . . . .
N(8) N(7) C(10) C(11) 0.2(7) ? . . . .
C(10) N(7) N(8) C(12) 0.4(9) ? . . . .
C(10) N(7) N(8) B(2) 179.9(5) ? . . . .
N(7) N(8) C(12) C(11) -0.8(11) ? . . . .
N(7) N(8) B(2) N(10) -59.5(9) ? . . . .
N(7) N(8) B(2) N(12) 57.3(9) ? . . . .
C(12) N(8) B(2) N(10) 119.8(10) ? . . . .
C(12) N(8) B(2) N(12) -123.4(10) ? . . . .
B(2) N(8) C(12) C(11) 179.7(7) ? . . . .
Ru(2) N(9) N(10) C(15) 179.9(4) ? . . . .
Ru(2) N(9) N(10) B(2) 0.1(6) ? . . . .
Ru(2) N(9) C(13) C(14) 179.1(5) ? . . . .
N(10) N(9) C(13) C(14) 0.1(7) ? . . . .
C(13) N(9) N(10) C(15) -0.9(8) ? . . . .
C(13) N(9) N(10) B(2) 179.2(6) ? . . . .
N(9) N(10) C(15) C(14) 1.5(10) ? . . . .
N(9) N(10) B(2) N(8) 57.9(8) ? . . . .
N(9) N(10) B(2) N(12) -59.5(8) ? . . . .
C(15) N(10) B(2) N(8) -122.0(9) ? . . . .
C(15) N(10) B(2) N(12) 120.7(9) ? . . . .
B(2) N(10) C(15) C(14) -178.7(8) ? . . . .
Ru(2) N(11) N(12) C(18) 179.4(4) ? . . . .
Ru(2) N(11) N(12) B(2) 0.4(7) ? . . . .
Ru(2) N(11) C(16) C(17) -179.3(5) ? . . . .
N(12) N(11) C(16) C(17) 0.6(7) ? . . . .
C(16) N(11) N(12) C(18) -0.5(7) ? . . . .
C(16) N(11) N(12) B(2) -179.5(5) ? . . . .
N(11) N(12) C(18) C(17) 0.2(7) ? . . . .
N(11) N(12) B(2) N(8) -57.5(7) ? . . . .
N(11) N(12) B(2) N(10) 59.8(7) ? . . . .
C(18) N(12) B(2) N(8) 123.8(7) ? . . . .
C(18) N(12) B(2) N(10) -118.9(7) ? . . . .
B(2) N(12) C(18) C(17) 179.1(7) ? . . . .
Ru(1) N(13) N(14) Ru(2) 1.1(4) ? . . . .
Ru(1) N(13) N(14) C(21) 175.9(3) ? . . . .
Ru(1) N(13) C(19) C(20) -174.2(4) ? . . . .
N(14) N(13) C(19) C(20) 0.7(6) ? . . . .
C(19) N(13) N(14) Ru(2) -175.1(3) ? . . . .
C(19) N(13) N(14) C(21) -0.3(5) ? . . . .
Ru(2) N(14) C(21) C(20) 173.0(4) ? . . . .
N(13) N(14) C(21) C(20) -0.3(6) ? . . . .
N(1) C(1) C(2) C(3) 0.7(10) ? . . . .
C(1) C(2) C(3) N(2) -0.2(8) ? . . . .
N(3) C(4) C(5) C(6) 0.3(7) ? . . . .
C(4) C(5) C(6) N(4) -0.4(8) ? . . . .
N(5) C(7) C(8) C(9) -2.4(8) ? . . . .
C(7) C(8) C(9) N(6) 2.9(8) ? . . . .
N(7) C(10) C(11) C(12) -0.7(11) ? . . . .
C(10) C(11) C(12) N(8) 0.9(12) ? . . . .
N(9) C(13) C(14) C(15) 0.7(10) ? . . . .
C(13) C(14) C(15) N(10) -1.4(10) ? . . . .
N(11) C(16) C(17) C(18) -0.5(9) ? . . . .
C(16) C(17) C(18) N(12) 0.1(7) ? . . . .
N(13) C(19) C(20) Br(1) -178.4(4) ? . . . .
N(13) C(19) C(20) C(21) -0.9(6) ? . . . .
Br(1) C(20) C(21) N(14) 178.3(4) ? . . . .
C(19) C(20) C(21) N(14) 0.7(6) ? . . . .
Cl(5) C(231) C(232) Cl(6) -123.3(13) ? . . . .
Cl(5) C(231) C(232) Cl(7) 116.3(13) ? . . . .
Cl(6) C(231) C(232) Cl(5) 123.3(13) ? . . . .
Cl(6) C(231) C(232) Cl(7) -120.4(11) ? . . . .
Cl(7) C(231) C(232) Cl(5) -116.3(13) ? . . . .
Cl(7) C(231) C(232) Cl(6) 120.4(11) ? . . . .

loop_
_geom_contact_atom_site_label_1
_geom_contact_atom_site_label_2
_geom_contact_distance
_geom_contact_publ_flag
_geom_contact_site_symmetry_1
_geom_contact_site_symmetry_2
Cl(1) C(9) 3.511(8) ? . 4_555
Cl(2) C(1) 3.539(10) ? . .
Cl(6) N(2) 3.389(8) ? . .
Cl(6) N(4) 3.585(7) ? . .
Cl(6) C(3) 3.446(10) ? . .
Cl(6) C(11) 3.599(8) ? . 3_556
Cl(7) C(10) 3.561(10) ? . 2_556
Cl(7) C(11) 3.373(13) ? . 2_556
O(1) C(22) 3.047(15) ? . .
N(2) Cl(6) 3.389(8) ? . .
N(4) Cl(6) 3.585(7) ? . .
C(1) Cl(2) 3.539(10) ? . .
C(3) Cl(6) 3.446(10) ? . .
C(9) Cl(1) 3.511(8) ? . 4_455
C(10) Cl(7) 3.561(10) ? . 2_546
C(11) Cl(6) 3.599(9) ? . 3_556
C(11) Cl(7) 3.373(13) ? . 2_546
C(13) C(15) 3.531(12) ? . 3_657
C(15) C(13) 3.531(12) ? . 3_657
C(22) O(1) 3.047(15) ? . .
Ru(1) H(23) 3.498 ? . .
Ru(2) H(23) 3.594 ? . .
Br(1) H(1) 3.34(6) ? . 4_555
Br(1) H(7) 3.350 ? . 2_546
Br(1) H(8) 3.421 ? . 4_555
Br(1) H(13) 3.291 ? . 2_556
Cl(1) H(11) 2.593 ? . 4_555
Cl(1) H(17) 3.418 ? . 3_657
Cl(1) H(20) 3.100 ? . 2_557
Cl(2) H(3) 3.406 ? . .
Cl(2) H(14) 3.202 ? . 4_445
Cl(3) H(9) 3.438 ? . .
Cl(3) H(9) 3.096 ? . 3_557
Cl(3) H(10) 3.219 ? . 3_557
Cl(3) H(14) 3.443 ? . 4_445
Cl(3) H(18) 3.176 ? . 3_557
Cl(3) H(19) 3.497 ? . 3_557
Cl(4) H(10) 3.171 ? . 3_557
Cl(4) H(17) 3.309 ? . 4_445
Cl(5) H(8) 2.961 ? . 3_566
Cl(5) H(13) 3.154 ? . 3_556
Cl(5) H(22) 3.001 ? . 2_556
Cl(6) H(12) 3.492 ? . 3_556
Cl(6) H(13) 2.955 ? . 3_556
Cl(6) H(21) 2.968 ? . .
Cl(7) H(5) 2.976 ? . 4_555
Cl(7) H(13) 3.509 ? . 2_556
Cl(7) H(21) 3.323 ? . .
Cl(7) H(22) 3.020 ? . 2_556
O(1) H(23) 2.085 ? . .
N(1) H(23) 3.504 ? . .
N(3) H(20) 3.237 ? . 2_557
N(5) H(20) 3.109 ? . 2_557
N(5) H(23) 3.508 ? . .
N(6) H(6) 3.512 ? . 4_455
N(6) H(15) 3.504 ? . 4_455
N(6) H(20) 3.563 ? . 2_557
N(9) H(16) 3.547 ? . 3_657
N(10) H(16) 3.598 ? . 3_657
N(11) H(16) 2.925 ? . 3_657
N(12) H(16) 3.073 ? . 3_657
N(13) H(1) 3.47(7) ? . 4_555
N(14) H(1) 3.58(6) ? . 4_555
N(14) H(4) 3.581 ? . 3_556
C(1) H(3) 3.124 ? . 3_556
C(1) H(23) 3.555 ? . .
C(2) H(3) 3.169 ? . 3_556
C(2) H(12) 3.030 ? . 3_556
C(3) H(12) 3.521 ? . 3_556
C(4) H(11) 3.506 ? . 4_555
C(4) H(19) 3.134 ? . 2_557
C(4) H(20) 3.456 ? . 2_557
C(5) H(19) 3.265 ? . 2_557
C(7) H(2) 3.15(5) ? . 2_557
C(7) H(20) 3.287 ? . 2_557
C(7) H(23) 3.584 ? . .
C(8) H(2) 3.05(5) ? . 2_557
C(8) H(17) 3.338 ? . 2_557
C(8) H(19) 3.345 ? . 3_557
C(9) H(6) 3.116 ? . 4_455
C(9) H(15) 3.205 ? . 4_455
C(9) H(19) 3.573 ? . 3_557
C(10) H(4) 3.381 ? . 3_556
C(16) H(16) 2.880 ? . 3_657
C(17) H(10) 3.267 ? . 3_557
C(17) H(16) 3.020 ? . 3_657
C(18) H(16) 3.132 ? . 3_657
C(19) H(1) 3.00(6) ? . 4_555
C(19) H(4) 3.265 ? . 3_556
C(20) H(1) 2.79(6) ? . 4_555
C(20) H(4) 2.954 ? . 3_556
C(20) H(8) 3.539 ? . 4_555
C(21) H(1) 3.19(6) ? . 4_555
C(21) H(4) 3.198 ? . 3_556
C(21) H(8) 3.339 ? . 4_555
C(22) H(14) 3.571 ? . 4_445
C(231) H(21) 3.511 ? . .
C(231) H(22) 3.424 ? . 2_556
C(232) H(13) 3.226 ? . 3_556
C(232) H(22) 3.578 ? . 2_556
H(1) Br(1) 3.34(6) ? . 4_455
H(1) N(13) 3.47(7) ? . 4_455
H(1) N(14) 3.58(6) ? . 4_455
H(1) C(19) 3.00(6) ? . 4_455
H(1) C(20) 2.79(6) ? . 4_455
H(1) C(21) 3.19(6) ? . 4_455
H(1) H(6) 3.221 ? . 4_455
H(1) H(21) 3.309 ? . 4_455
H(2) C(7) 3.15(5) ? . 2_547
H(2) C(8) 3.05(5) ? . 2_547
H(2) H(9) 3.150 ? . 2_547
H(2) H(10) 3.025 ? . 2_547
H(3) Cl(2) 3.406 ? . .
H(3) C(1) 3.124 ? . 3_556
H(3) C(2) 3.169 ? . 3_556
H(3) H(3) 2.703 ? . 3_556
H(3) H(4) 2.826 ? . 3_556
H(3) H(23) 3.422 ? . .
H(4) N(14) 3.581 ? . 3_556
H(4) C(10) 3.381 ? . 3_556
H(4) C(19) 3.265 ? . 3_556
H(4) C(20) 2.954 ? . 3_556
H(4) C(21) 3.198 ? . 3_556
H(4) H(3) 2.826 ? . 3_556
H(4) H(12) 2.575 ? . 3_556
H(4) H(22) 3.564 ? . 3_556
H(5) Cl(7) 2.976 ? . 4_455
H(5) H(6) 3.376 ? . 4_455
H(5) H(12) 3.536 ? . 3_556
H(5) H(13) 3.484 ? . 3_556
H(5) H(21) 3.318 ? . 4_455
H(6) N(6) 3.512 ? . 4_555
H(6) C(9) 3.116 ? . 4_555
H(6) H(1) 3.221 ? . 4_555
H(6) H(5) 3.376 ? . 4_555
H(6) H(11) 2.710 ? . 4_555
H(6) H(19) 3.040 ? . 2_557
H(7) Br(1) 3.350 ? . 2_556
H(7) H(19) 3.307 ? . 2_557
H(8) Br(1) 3.421 ? . 4_455
H(8) Cl(5) 2.961 ? . 3_566
H(8) C(20) 3.539 ? . 4_455
H(8) C(21) 3.339 ? . 4_455
H(8) H(15) 3.406 ? . 4_455
H(8) H(22) 2.966 ? . 4_455
H(9) Cl(3) 3.438 ? . .
H(9) Cl(3) 3.096 ? . 3_557
H(9) H(2) 3.150 ? . 2_557
H(9) H(20) 3.497 ? . 2_557
H(9) H(23) 3.470 ? . .
H(10) Cl(3) 3.219 ? . 3_557
H(10) Cl(4) 3.171 ? . 3_557
H(10) C(17) 3.267 ? . 3_557
H(10) H(2) 3.025 ? . 2_557
H(10) H(17) 2.896 ? . 2_557
H(10) H(19) 3.099 ? . 3_557
H(11) Cl(1) 2.593 ? . 4_455
H(11) C(4) 3.506 ? . 4_455
H(11) H(6) 2.710 ? . 4_455
H(11) H(15) 2.892 ? . 4_455
H(11) H(17) 3.447 ? . 2_557
H(11) H(19) 3.560 ? . 3_557
H(12) Cl(6) 3.492 ? . 3_556
H(12) C(2) 3.030 ? . 3_556
H(12) C(3) 3.521 ? . 3_556
H(12) H(4) 2.575 ? . 3_556
H(12) H(5) 3.536 ? . 3_556
H(13) Br(1) 3.291 ? . 2_546
H(13) Cl(5) 3.154 ? . 3_556
H(13) Cl(6) 2.955 ? . 3_556
H(13) Cl(7) 3.509 ? . 2_546
H(13) C(232) 3.226 ? . 3_556
H(13) H(5) 3.484 ? . 3_556
H(14) Cl(2) 3.202 ? . 4_545
H(14) Cl(3) 3.443 ? . 4_545
H(14) C(22) 3.571 ? . 4_545
H(15) N(6) 3.504 ? . 4_555
H(15) C(9) 3.205 ? . 4_555
H(15) H(8) 3.406 ? . 4_555
H(15) H(11) 2.892 ? . 4_555
H(15) H(17) 3.563 ? . 3_657
H(16) N(9) 3.547 ? . 3_657
H(16) N(10) 3.598 ? . 3_657
H(16) N(11) 2.925 ? . 3_657
H(16) N(12) 3.073 ? . 3_657
H(16) C(16) 2.880 ? . 3_657
H(16) C(17) 3.020 ? . 3_657
H(16) C(18) 3.132 ? . 3_657
H(16) H(18) 3.295 ? . 3_657
H(16) H(19) 3.512 ? . 3_657
H(17) Cl(1) 3.418 ? . 3_657
H(17) Cl(4) 3.309 ? . 4_545
H(17) C(8) 3.338 ? . 2_547
H(17) H(10) 2.896 ? . 2_547
H(17) H(11) 3.447 ? . 2_547
H(17) H(15) 3.563 ? . 3_657
H(18) Cl(3) 3.176 ? . 3_557
H(18) H(16) 3.295 ? . 3_657
H(19) Cl(3) 3.497 ? . 3_557
H(19) C(4) 3.134 ? . 2_547
H(19) C(5) 3.265 ? . 2_547
H(19) C(8) 3.345 ? . 3_557
H(19) C(9) 3.573 ? . 3_557
H(19) H(6) 3.040 ? . 2_547
H(19) H(7) 3.307 ? . 2_547
H(19) H(10) 3.099 ? . 3_557
H(19) H(11) 3.560 ? . 3_557
H(19) H(16) 3.512 ? . 3_657
H(20) Cl(1) 3.100 ? . 2_547
H(20) N(3) 3.237 ? . 2_547
H(20) N(5) 3.109 ? . 2_547
H(20) N(6) 3.563 ? . 2_547
H(20) C(4) 3.456 ? . 2_547
H(20) C(7) 3.287 ? . 2_547
H(20) H(9) 3.497 ? . 2_547
H(21) Cl(6) 2.968 ? . .
H(21) Cl(7) 3.323 ? . .
H(21) C(231) 3.511 ? . .
H(21) H(1) 3.309 ? . 4_555
H(21) H(5) 3.318 ? . 4_555
H(22) Cl(5) 3.001 ? . 2_546
H(22) Cl(7) 3.020 ? . 2_546
H(22) C(231) 3.424 ? . 2_546
H(22) C(232) 3.578 ? . 2_546
H(22) H(4) 3.564 ? . 3_556
H(22) H(8) 2.966 ? . 4_555
H(23) Ru(1) 3.498 ? . .
H(23) Ru(2) 3.594 ? . .
H(23) O(1) 2.085 ? . .
H(23) N(1) 3.504 ? . .
H(23) N(5) 3.508 ? . .
H(23) C(1) 3.555 ? . .
H(23) C(7) 3.584 ? . .
H(23) H(3) 3.422 ? . .
H(23) H(9) 3.470 ? . .
Ru(1) Ru(2) 3.0491(6) ? . .


#==============================================================================

# Additional structures and associated data_? identifiers
# should be added at this point if there is more than one 
# structure analysis in the CIF.

#==============================================================================

#     End of CIF

#==============================================================================
